# Supplementary material
Source: Research Square preprint supplement (doi:10.21203/rs.3.rs-9301888/v1)
Supplement: Supplementary file 1 [file 7052105b706c81fe29c5efaa.docx]

# Appendices

## Appendix A: Descriptive Statistics.

Table 7: Descriptive Statistics.

| Variable Name | Definition | Remains in Employment (Untreated) | Employment to Self-Employment[[1]](#footnote-1) (Treated) |
| --- | --- | --- | --- |
|  |  | N=7,073 | N=2,382 |
| Life Satisfaction | Self-reported satisfaction with life overall | 5.23 (1.31) | 5.19 (1.35) |
| Job Satisfaction | Self-reported satisfaction with current occupation | 5.29 (1.39)*** | 5.67 (1.22)*** |
| Income Satisfaction | Self-reported satisfaction with income level | 4.73 (1.55) | 4.67 (1.57) |
| Leisure Time Satisfaction | Self-reported satisfaction with amount of Leisure Time | 4.30 (1.54) | 4.34 (1.58) |
| Health Satisfaction | Self-reported satisfaction with one’s Health | 5.01 (1.58) | 5.04 (1.59) |
| Age | An Individual’s Age | 42 (11)*** | 43 (11)*** |
| Gender | A binary variable that indicates an Individual’s Gender |  |  |
| Male |  | 71%*** | 75% *** |
| Female |  | 29% *** | 25% *** |
| Ethnicity | A categorical variable that classifies an Individual’s Ethnicity |  |  |
| White |  | 83% | 83% |
| Mixed |  | 2% | 1% |
| Asian |  | 12% | 13% |
| Black |  | 2% | 2% |
| Other |  | 1% | 1% |
| Highest Achieved Education Qualification | A categorical variable that classifies an Individual’s Highest Educational Qualification, as per the British Educational Categorisation system |  |  |
| Other Education |  | 2% *** | 2% *** |
| Level 2 |  | 29% *** | 34% *** |
| Level 3 |  | 12% *** | 12% *** |
| Level 4 |  | 2% *** | 2% *** |
| Level 5 |  | 34% *** | 31% *** |
| Level 6, or higher |  | 21% *** | 18%*** |
| Marital Status | A categorical variable that classifies an Individual’s Marital Status |  |  |
| Single |  | 29% | 29% |
| Married/Civil Partnership |  | 61% | 62% |
| Separated/Divorced |  | 9% | 9% |
| Widowed |  | 1% | 1% |
| Children under 16 | A binary variable that indicates if an Individual has children under 16 |  |  |
| Does Not Have Children |  | 90% ** | 92% ** |
| Has Children |  | 10% ** | 8%** |
| Personal Income | An Individual’s Personal Income from their Occupation | 2094 (2430)*** | 1562 (1163)*** |
| Work Hours (per week) | Average Number of Hours Worked in Occupation per Week | 40 (8)*** | 44 (11)*** |
| Industry | Industry in which the individual is employed within |  |  |
| Agriculture/Forestry |  | 1% *** | 3%*** |
| Fisheries |  | - | - |
| Energy/Water |  | 1% *** | 1% *** |
| Mining |  | 0% *** | 0% *** |
| Chemicals |  | 1% *** | 0% *** |
| Synthetics |  | 0% *** | 0% *** |
| Earth/Clay/Stone Work |  | 0% *** | 0% *** |
| Iron/Steel Work |  | 0% *** | 0% *** |
| Mechanical Eng. |  | 5% *** | 2% *** |
| Electrical Eng. |  | 1% *** | 0% *** |
| Wood/Paper/Printing |  | 2% *** | 1% *** |
| Clothing/Textiles |  | 2% *** | 3% *** |
| Food |  | 1% *** | 0% *** |
| Construction |  | 6% *** | 8% *** |
| Construction Related |  | 7% *** | 13% *** |
| Wholesale |  | 2% *** | 1% *** |
| Trading Agents |  | 0% *** | 0% *** |
| Retail |  | 6% *** | 6% *** |
| Train System |  | 0% *** | 0% *** |
| Communication/Entertainment |  | 4% *** | 5% *** |
| Other Transport |  | 6% *** | 9% *** |
| Financial Institutions |  | 3% *** | 3% *** |
| Insurance |  | 1% *** | 1% *** |
| Restaurants |  | 3% *** | 2% *** |
| Service Industry |  | 2% *** | 3% *** |
| Trash Removal |  | 1% *** | 0% *** |
| Education/Sport |  | 9% *** | 8% *** |
| Health Service |  | 6% *** | 4% *** |
| Legal Services |  | 4% *** | 4% *** |
| Other Services |  | 15% *** | 15% *** |
| Volunteer/Church |  | 6% *** | 5% *** |
| Private Household |  | 0% *** | 1% *** |
| Public Admin. |  | 4% *** | 1% *** |
| Social Sector |  | 0% *** | 0% *** |
| Urban/Rural | Binary variable indicating if an individual resides in a rural or urban setting |  |  |
| Rural |  | 24%*** | 27%*** |
| Urban |  | 76% *** | 73%*** |
| Region | Region of the UK an individual resides in |  |  |
| North East |  | 3% ** | 3% ** |
| North West |  | 11% ** | 10% ** |
| Yorkshire and the Humber |  | 7% ** | 7% ** |
| East Midlands |  | 8% ** | 7% ** |
| West Midlands |  | 8% ** | 9% ** |
| East of England |  | 10% ** | 8% ** |
| London |  | 13% ** | 15% ** |
| South East |  | 15% ** | 13% ** |
| South West |  | 12% ** | 13% ** |
| Wales |  | 4% ** | 4% ** |
| Scotland |  | 7% ** | 8% ** |
| Northern Ireland |  | 2% ** | 2% ** |

*Data are presented as Mean (SD) for continuous measures, and % for categorical measures.

*** p<0.01, ** p<0.05, * p<0.1, (t-test) H0: No difference between individuals who remain in paid-employment and those who transition into self-employment

## Appendix B: Propensity Score Matching (PSM)

Equation A outlines the average treatment effect on treated individuals, *aTT*.

This is the difference of the two properties, *RT*|*C = 1*, the outcome variable for the treated cohort, and *RU*|*C = 0*, the counterfactual potential outcome if the treated individual had not been treated. In our scenario, the outcome variable is one of five reported satisfaction measures, and the treatment is self-employment entry. Whereas *RT* is directly observed, *RU* must be estimated, as it is the situation that did not take place. To estimate *RU,* PSM is used to match treated units with untreated units on a set of observable characteristics, *X*, so that untreated individuals are statistically identical to treated individuals in all characteristics except for the treatment. The outcome for the untreated units is then used as the *RU*value.

(A)

Criteria upon which individuals are matched need to be identified, to conduct the matching procedure for PSM. Table X below outlines the observable characteristics individuals upon which individuals are matched. This aligns with other self-employment studies that have implemented PSM (Richter and Patel, 2022) and have been emphasized as crucial for consideration in self-employment research (Parker, 2018). .

Table 8: Logit model on probability of self-employment entry

|  |  |
| --- | --- |
| VARIABLES |  |
|  |  |
| Age (logged): | 0.214** |
|  | (0.0927) |
| Gender |  |
| *Female* | -0.487*** |
|  | (0.0604) |
| Ethnicity |  |
| *Mixed* | -0.327* |
|  | (0.184) |
| *Asian* | 0.399*** |
|  | (0.0758) |
| *Black* | -0.279* |
|  | (0.148) |
| *Other* | 0.242 |
|  | (0.265) |
| Highest Achieved Education Qualification |  |
| *Level 2* | -0.290 |
|  | (0.183) |
| *Level 3* | -0.252 |
|  | (0.191) |
| *Level 4* | -0.212 |
|  | (0.231) |
| *Level 5* | -0.0381 |
|  | (0.184) |
| *Level 6 or higher* | 0.111 |
|  | (0.187) |
| Marital Status |  |
| *Married/Civil Partnership* | 0.132** |
|  | (0.0586) |
| *Separated/Divorced* | -0.0229 |
|  | (0.0908) |
| *Widowed* | 0.185 |
|  | (0.251) |
| Children under 16 |  |
| *Has Children* | 0.0324 |
|  | (0.0869) |
|  |  |
| Income (logged), (lagged) | -0.328*** |
|  | (0.0233) |
| Work Hours (per week), lagged | 0.0453*** |
|  | (0.00229) |
| Industry, lagged |  |
| *Fisheries*[[2]](#footnote-2) | - |
|  |  |
| *Energy/Water* | -1.100*** |
|  | (0.329) |
| *Mining* | -1.279*** |
|  | (0.425) |
| *Chemicals* | -1.546*** |
|  | (0.396) |
| *Synthetics* | -1.593*** |
|  | (0.533) |
| *Earth/Clay/Stone Work* | - |
|  |  |
| *Iron/Steel Work* | -2.448** |
|  | (1.018) |
| *Mechanical Eng.* | -1.070*** |
|  | (0.212) |
| *Electrical Eng.* | -0.938*** |
|  | (0.300) |
| *Wood/Paper/Priting* | -0.810*** |
|  | (0.246) |
| *Clothing/Textiles* | 0.122 |
|  | (0.215) |
| *Food* | -1.216*** |
|  | (0.289) |
| *Construction* | 0.256 |
|  | (0.188) |
| *Construction Related* | 0.738*** |
|  | (0.182) |
| *Wholesale* | -0.933*** |
|  | (0.234) |
| *Trading Agents* | - |
|  |  |
| *Retail* | -0.688*** |
|  | (0.192) |
| *Train System* | -1.330** |
|  | (0.533) |
| *Communication/Entertainment* | -0.435** |
|  | (0.202) |
| *Other Transport* | -0.107 |
|  | (0.189) |
| *Financial Institutions* | -0.555** |
|  | (0.215) |
| *Insurance* | -0.644** |
|  | (0.284) |
| *Restaurants* | -0.717*** |
|  | (0.219) |
| *Service Industry* | 0.738*** |
|  | (0.232) |
| *Trash Removal* | -0.938** |
|  | (0.401) |
| *Education/Sport* | -0.862*** |
|  | (0.189) |
| *Health Service* | -1.115*** |
|  | (0.202) |
| *Legal Services* | -0.104 |
|  | (0.202) |
| *Other Services* | -0.155 |
|  | (0.181) |
| *Volunteer/Church* | -0.738*** |
|  | (0.197) |
| *Private Household* | 1.560*** |
|  | (0.450) |
| *Public Admin.* | -1.817*** |
|  | (0.226) |
| *Social Sector* | -2.256** |
|  | (1.018) |
| Urban/Rural |  |
| *Urban* | -0.153*** |
|  | (0.0549) |
| Region |  |
| *North West* | 0.367** |
|  | (0.146) |
| *Yorkshire and the Humber* | 0.125 |
|  | (0.153) |
| *East Midlands* | 0.309** |
|  | (0.152) |
| *West Midlands* | 0.483*** |
|  | (0.149) |
| *East of England* | 0.255* |
|  | (0.150) |
| *London* | 0.518*** |
|  | (0.147) |
| *South East* | 0.365** |
|  | (0.142) |
| *South West* | 0.614*** |
|  | (0.144) |
| *Wales* | -0.00672 |
|  | (0.174) |
| *Scotland* | 0.280* |
|  | (0.154) |
| *Northern Ireland* | -0.279 |
|  | (0.196) |
| Life Satisfaction, lagged | -0.0201 |
|  | (0.0232) |
| Job Satisfaction, lagged | 0.0614*** |
|  | (0.0180) |
| Income Satisfaction, lagged | -0.00310 |
|  | (0.0189) |
| Leisure Time Satisfaction, lagged | 0.0210 |
|  | (0.0181) |
| Health Satisfaction, lagged | 0.00115 |
|  | (0.0169) |
| Aggregate Satisfaction, lagged | - |
|  |  |
| Year |  |
| *2011* | 0.523*** |
|  | (0.134) |
| *2012* | 0.708*** |
|  | (0.129) |
| *2013* | 0.951*** |
|  | (0.124) |
| *2014* | 1.152*** |
|  | (0.123) |
| *2015* | 1.201*** |
|  | (0.123) |
| *2016* | 1.204*** |
|  | (0.122) |
| *2017* | 1.245*** |
|  | (0.123) |
| *2018* | 1.302*** |
|  | (0.125) |
| *2019* | 1.119*** |
|  | (0.129) |
| *2020* | 1.091*** |
|  | (0.133) |
| Constant | -4.550*** |
|  | (0.489) |
|  |  |
| Wald-χ2 | 2292.46*** |
| Pseudo R2 | 0.1121 |
| Observations | 77,310 |

Standard errors in parentheses

*** p<0.01, ** p<0.05, * p<0.1

The model serving as the basis for establishing the control and treated groups is outlined as Equation B below.

(B)

Where the binary outcome variable, *Treatmentit*, takes a value of 1 if individual *i* in time *t* is in self-employment and in time *t-1* in paid employment, and a value of 0 otherwise. *Satit-1* denotes the five self-reported satisfaction measures of individual *i*, and also an aggregate satisfaction measure[[3]](#footnote-3) to ensure that individuals have a similar “overall” satisfaction level of individuals, all were observed in the previous time period, *t-1*.

*Empit-1* outlines the economic characteristics if individual *i*, such as their employment pay level, number of hours worked in their occupation and the industry of their once again it is taken from the previous time period, *t-1*. The demographic, familial and regional characteristics of individual *i* are provided by *Xit*.  *δt*, which is a series of time dummies, accounts for the unobserved time effects within the model, and the error term of the model is denoted by *μit.* The logit regression results of Equation A are given below in Table 2.

Table 9: Balance of the control variables after matching treated and untreated individuals

|  | Mean | |  | Bias | t-test | |
| --- | --- | --- | --- | --- | --- | --- |
|  | Treated | Control |  | % | t-stat | p-value |
| Age (logged) | 3.7275 | 3.7196 |  | 2.9 | 0.95 | 0.343 |
| Gender |  |  |  |  |  |  |
| *Male* | . | . |  | . | . | . |
| *Female* | .26795 | .25135 |  | 3.5 | 1.26 | 0.206 |
| Ethnicity |  |  |  |  |  |  |
| *White* | . | . |  | . | . | . |
| *Mixed* | .01481 | .01526 |  | -0.3 | -0.12 | 0.902 |
| *Asian* | .12433 | .11625 |  | 2.7 | 0.83 | 0.407 |
| *Black* | .02379 | .01571 |  | 4.7 | 1.94 | 0.053 |
| *Other* | .00673 | .00853 |  | -2.3 | -0.69 | 0.491 |
| Highest Achieved Education Qualification |  |  |  |  |  |  |
| *Other Education* | . | . |  | . | . | . |
| *Level 2* | .32855 | .33259 |  | -0.9 | -0.29 | 0.774 |
| *Level 3* | .1149 | .11984 |  | -1.5 | -0.51 | 0.609 |
| *Level 4* | .02334 | .02334 |  | 0.0 | -0.00 | 1.000 |
| *Level 5* | .3254 | .32002 |  | 1.1 | 0.38 | 0.701 |
| *Level 6, or higher* | .19165 | .18896 |  | 0.7 | 0.23 | 0.819 |
| Marital Status |  |  |  |  |  |  |
| *Single* | . | . |  | . | . | . |
| *Married/Civil Partnership* | .6149 | .60054 |  | 2.9 | 0.98 | 0.326 |
| *Separated/Divorced* | .09291 | .09605 |  | -1.0 | -0.36 | 0.720 |
| *Widowed* | .00763 | .00943 |  | -2.0 | -0.65 | 0.515 |
| Children under 16 |  |  |  |  |  |  |
| *Does Not Have Children* | . | . |  | . | . | . |
| *Has Children* | .08752 | .07899 |  | 2.7 | 1.03 | 0.303 |
| Income (logged) (lagged) | 7.0741 | 7.0862 |  | -1.3 | -0.41 | 0.684 |
| Work Hours (per week) (lagged) | 42.618 | 42.272 |  | 4.1 | 1.18 | 0.238 |
| Industry (lagged) |  |  |  |  |  |  |
| *Agriculture/Forestry* | . | . |  | . | . | . |
| *Fisheries* | 0 | 0 |  | . | . | . |
| *Energy/Water* | .00583 | .00808 |  | -2.5 | -0.90 | 0.368 |
| *Mining* | .00314 | .00449 |  | -2.3 | -0.73 | 0.466 |
| *Chemicals* | .00359 | .00269 |  | 1.1 | 0.54 | 0.592 |
| *Synthetics* | .0018 | .0018 |  | 0.0 | 0.00 | 1.000 |
| *Earth/Clay/Stone Work* | 0 | 0 |  | . | . | . |
| *Iron/Steel Work* | .00045 | 0 |  | 1.0 | 1.00 | 0.317 |
| *Mechanical Eng.* | .02962 | .02469 |  | 2.6 | 1.01 | 0.311 |
| *Electrical Eng.* | .00763 | .01077 |  | -3.2 | -1.10 | 0.272 |
| *Wood/Paper/Printing* | .01481 | .01257 |  | 1.8 | 0.64 | 0.519 |
| *Clothing/Textiles* | .02873 | .02873 |  | 0.0 | -0.00 | 1.000 |
| *Food* | .00853 | .00494 |  | 3.4 | 1.47 | 0.143 |
| *Construction* | .0763 | .08618 |  | -4.5 | -1.21 | 0.228 |
| *Construction Related* | .10952 | .10862 |  | 0.4 | 0.10 | 0.923 |
| *Wholesale* | .01795 | .01436 |  | 2.5 | 0.95 | 0.342 |
| *Trading Agents* | 0 | 0 |  | . | . | . |
| *Retail* | .06104 | .0579 |  | 1.3 | 0.44 | 0.658 |
| *Train System* | .0018 | .00135 |  | 0.8 | 0.38 | 0.705 |
| *Communication/Entertainment* | .04264 | .05341 |  | -5.7 | -1.68 | 0.093 |
| *Other Transport* | .0754 | .08528 |  | -4.3 | -1.21 | 0.225 |
| *Financial Institutions* | .02962 | .02424 |  | 3.1 | 1.11 | 0.267 |
| *Insurance* | .00898 | .00853 |  | 0.4 | 0.16 | 0.872 |
| *Restaurants* | .02469 | .02603 |  | -0.9 | -0.29 | 0.775 |
| *Service Industry* | .02154 | .02289 |  | -1.1 | -0.30 | 0.760 |
| *Trash Removal* | .00359 | .00628 |  | -4.3 | -1.28 | 0.200 |
| *Education/Sport* | .08752 | .09291 |  | -1.7 | -0.63 | 0.530 |
| *Health Service* | .04533 | .03456 |  | 4.1 | 1.84 | 0.066 |
| *Legal Services* | .04309 | .04129 |  | 0.9 | 0.30 | 0.766 |
| *Other Services* | .15036 | .15126 |  | -0.3 | -0.08 | 0.933 |
| *Volunteer/Church* | .05296 | .05341 |  | -0.2 | -0.07 | 0.947 |
| *Private Household* | .00269 | .0018 |  | 2.0 | 0.63 | 0.527 |
| *Public Admin.* | .02154 | .01571 |  | 2.5 | 1.44 | 0.150 |
| *Social Sector* | .00045 | .00135 |  | -1.9 | -1.00 | 0.317 |
| Urban/Rural |  |  |  |  |  |  |
| *Rural* | . | . |  | . | . | . |
| *Urban* | .73923 | .73968 |  | -0.1 | -0.03 | 0.973 |
| Region |  |  |  |  |  |  |
| *North East* | . | . |  | . | . | . |
| *North West* | .10413 | .12702 |  | -7.4 | -2.39 | 0.017 |
| *Yorkshire and the Humber* | .07226 | .07765 |  | -2.0 | -0.68 | 0.495 |
| *East Midlands* | .0772 | .07047 |  | 2.5 | 0.86 | 0.390 |
| *West Midlands* | .09201 | .08797 |  | 1.4 | 0.47 | 0.638 |
| *East of England* | .08618 | .07944 |  | 2.3 | 0.82 | 0.415 |
| *London* | .14138 | .13106 |  | 3.0 | 1.00 | 0.315 |
| *South East* | .14228 | .14408 |  | -0.5 | -0.17 | 0.864 |
| *South West* | .12478 | .12074 |  | 1.3 | 0.41 | 0.681 |
| *Wales* | .03546 | .02917 |  | 3.1 | 1.19 | 0.236 |
| *Scotland* | .07406 | .07361 |  | 0.2 | 0.06 | 0.954 |
| *Northern Ireland* | .02199 | .0193 |  | 1.6 | 0.63 | 0.527 |
| Life Satisfaction (lagged) | 5.2217 | 5.2316 |  | -0.7 | -0.25 | 0.802 |
| Job Satisfaction (lagged) | 5.4399 | 5.3941 |  | 3.3 | 1.13 | 0.260 |
| Income Satisfaction (lagged) | 4.6912 | 4.7222 |  | -2.0 | -0.65 | 0.513 |
| Leisure Time Satisfaction (lagged) | 4.3205 | 4.3649 |  | -2.9 | -0.96 | 0.337 |
| Health Satisfaction (lagged) | 5.0206 | 4.9829 |  | 2.4 | 0.79 | 0.429 |
| Aggregate Satisfaction (lagged) | 4.9388 | 4.9391 |  | -0.0 | -0.01 | 0.991 |
| Year | . | . |  | . | . | . |
| *2009* | .04354 | .04354 |  | 0.0 | 0.00 | 1.000 |
| *2010* | .06463 | .06463 |  | 0.0 | -0.00 | 1.000 |
| *2011* | .07989 | .07989 |  | 0.0 | 0.00 | 1.000 |
| *2012* | .10368 | .10368 |  | 0.0 | -0.00 | 1.000 |
| *2013* | .11041 | .11041 |  | 0.0 | 0.00 | 1.000 |
| *2014* | .11131 | .11131 |  | 0.0 | 0.00 | 1.000 |
| *2015* | .12029 | .12029 |  | 0.0 | -0.00 | 1.000 |
| *2016* | .11086 | .11086 |  | 0.0 | 0.00 | 1.000 |
| *2017* | .10413 | .10413 |  | 0.0 | 0.00 | 1.000 |
| *2018* | .07989 | .07989 |  | 0.0 | 0.00 | 1.000 |
| *2019* | .07136 | .07136 |  | 0.0 | 0.00 | 1.000 |
| *2020* | .04354 | .04354 |  | 0.0 | 0.00 | 1.000 |
| Pseudo R2 | 0.009 |  |  |  |  |  |
| LR-chi2 | 53.52 |  |  |  |  |  |
| p>chi2 | 0.958 |  |  |  |  |  |
| MeanBias | 1.7 |  |  |  |  |  |
| MedBias | 1.5 |  |  |  |  |  |
| Rubin's B | 22.0 |  |  |  |  |  |
| Rubin's R | 1.01 |  |  |  |  |  |

Nearest neighbour PSM is used for this study, which matches treated units with the closest untreated units in terms of their propensity score (Mulligan *et al.*, 2022). To reduce the likelihood of “bad matches”, a tolerance level, a calliper, is set on the maximum propensity score distance between treated and untreated firms. This is set to 0.2 times the standard deviation of the propensity scores (Austin, 2011). Therefore, treated individuals can only be matched to untreated individuals within this calliper range. Further, exact matching based on year is done to avoid individuals matching with themselves in a different time period.

Previous research has emphasised that selecting an algorithm involves balancing bias and the efficiency of the matching estimator (Caliendo and Kopeinig, 2008). In nearest-neighbour matching, it is considered optimal to use only the closest observation based on the propensity score for comparison with treated units, as this minimises bias in the process (Almus and Czarnitzki, 2003; Czarnitzki *et al.*, 2011; Czarnitzki and Lopes-Bento, 2013).Consequently, only the nearest observation is used in the matching process.

To ensure a robust matching procedure, the mean values of the treatment and control groups should not show significant differences in pre-treatment variables after matching. Table 3 presents the results of a balance test for the matching criteria used in the propensity score estimation. A t-test is conducted to determine whether the mean values of each variable are the same in both the treatment and control groups post-matching. The results show no significant differences in observable characteristics between the treated individuals and the control group after matching.

Table 3 also includes a series of diagnostic tests developed by Leuven and Sianesi (2018) to assess the quality of balance between the control group and treated firms. The results show that Rubin’s B, which measures the absolute standardised difference in means of a linear index of the propensity score between treated and matched non-treated groups, falls below the maximum threshold of 25%. Similarly, Rubin’s R, representing the ratio of variances between treated and matched non-treated groups, is within the acceptable range of 0.5 to 2, indicating adequate balance. Additionally, the mean bias is reduced to below the 5% threshold after matching. Overall, these findings suggest that the matching process is reliable for investigation (Leuven and Sianesi, 2018).

## Appendix C: The Role of Job-Satisfaction in Self-Employment Entry

Understanding the impact of self-employment entry on well-being directly related to an individual’s occupation is potentially not as straightforward as with other aspects of well-being. Research has often found that self-employed individuals exhibit higher levels of job satisfaction relative to individuals in paid employment (Abreu *et al.*, 2019; Fritsch *et al.*, 2021). This is seen to occur due to increased engagement with the work (Millán *et al.*, 2013), where self-employed individuals are more satisfied with the type of work they do in their occupation than individuals in paid employment. A similar trend does also emerge with other well-being measures, such as an individual's satisfaction with their life or their time spent outside the workplace being higher for self-employed individuals (Stephan *et al.*, 2022; Van Der Zwan *et al.*, 2020).

However, a key distinction exists between an individual’s well-being directly related to their occupation and other well-being measures, which is baseline level of occupation related well-being in paid employment before entering self-employment (Guerra and Patuelli, 2016). Studies have found that increasing one’s level of occupation related well-being is a key motivation factor for leaving paid employment for self-employment (Guerra and Patuelli, 2016), whereas this is not as clearly seen for other aspects of well-being where if they are motivation factors is more ambiguous.

These two observations taken on the role of well-being directly relating to an individual’s occupation, where higher levels are seen for self-employed individuals (Abreu *et al.*, 2019; Fritsch *et al.*, 2021) but it is also a motivating factor for transitioning into self-employment (Guerra and Patuelli, 2016), indicate that the job satisfaction of individuals in paid who are considering self-employment entry is reduced relative to individuals who are not considering the occupation change. This is potentially due to prospective self-employed individuals in paid employment not being satisfied with their workload to a higher degree than average, and this then causes them to consider self-employment as an alternative. Therefore, increases seen in well-being directly related to one’s occupation due to self-employment entry, are inflated to a degree much higher than that seen in other well-being measures due to an inherent dissatisfaction with their employment situation prior to entering self-employment. As such, while self-employment entry can cause increases in other aspects of well-being, changes in occupation-related well-being are contingent on the individuals prior employment situation.

Our study echoes this where it was found that individuals who entered self-employment report, on average, higher satisfaction with their employment, at 5.67 out of 7, compared to individuals who remained in paid employment, at 5.29 out of 7. Interestingly, there is also increased variance observed in the cohort who remained in paid employment, indicating that there is a greater variety of job satisfaction levels in those who remain in paid employment compared to individuals who transitioned to self-employment.

Table 1: Job Satisfaction Descriptive Statistics

| Variable Name | Definition | Remains in Employment (Untreated) | Employment to Self-Employment[[4]](#footnote-4) (Treated) |
| --- | --- | --- | --- |
|  |  | N=7,300 | N=2,389 |
| Job Satisfaction | Self-reported satisfaction with life overall | 5.29 (1.39) | 5.67 (1.22) |
|  |  |  |  |

From the Difference-in-Difference estimations, see Table X below, we find evidence that the baseline job satisfaction is not comparable for individuals who do and who do not become self-employed. As there is a violation of the parallel trends assumption, where the pre-treatment variable is statistically significant, it implies that the treatment and control groups did not exhibit similar behaviour prior to the self-employment entry of the treatment group. As the pre-treatment variable is negative, this means that prior to self-employment entry, individuals who would enter self-employment have lower job satisfaction than those who would remain in paid employment. Taking this result with the treatment variable being significant and positive, which gives evidence that upon self-employment entry individuals obtain an increase in job satisfaction, indicates that individuals who enter self-employment have reduced job satisfaction in paid employment and then gain an increase in this well-being aspect upon self-employment entry. However, we cannot infer that this scenario is due to self-employment entry and as a result of the reduced job-satisfaction observed in paid employment.

Therefore, it appears, from both previous research in the area and the empirical investigations of this study, that occupational related well-being increases are not simply caused by an individual becoming self-employed. While both our research and the findings of other studies (Abreu *et al.*, 2019; Fritsch *et al.*, 2021) show that self-employed individuals exhibit greater satisfaction with their occupation, it seems becoming self-employed is not the driver of this change. As the individual’s dissatisfaction with their employment situation can be a central motivating factor (Guerra and Patuelli, 2016), there is a fundamental difference between prospective self-employed individuals and individuals who do not wish to become self-employed in terms of their occupational related well-being.

Table 3: Satisfaction with Job, Ologit

|  | Full Sample | | | | Male Sub-Sample | | | Female Sub-Sample | | |
| --- | --- | --- | --- | --- | --- | --- | --- | --- | --- | --- |
|  | (1) | (2) | (3) | (4) | (5) | (6) | (7) | (8) | (9) | (10) |
| VARIABLES | Controls | Baseline Model | Two Way Interaction | Three Way Interaction | Controls | Baseline Model | Two Way Interaction | Controls | Baseline Model | Two Way Interaction |
|  |  |  |  |  |  |  |  |  |  |  |
| Treatment | 0.492*** | 0.499*** | 1.350* | 2.030** | 0.491*** | 0.498*** | 2.103** | 0.473*** | 0.479*** | -0.748 |
|  | (0.0648) | (0.0647) | (0.787) | (0.935) | (0.0746) | (0.0744) | (0.924) | (0.131) | (0.131) | (1.496) |
| Pre-Treatment | -0.273*** | -0.283*** | -0.280*** | -0.279*** | -0.273*** | -0.285*** | -0.278*** | -0.282** | -0.295** | -0.299** |
|  | (0.0700) | (0.0704) | (0.0705) | (0.0706) | (0.0841) | (0.0843) | (0.0844) | (0.136) | (0.137) | (0.137) |
| Post Treatment | 0.0534 | 0.0618 | 0.0576 | 0.0586 | 0.0480 | 0.0550 | 0.0462 | 0.0381 | 0.0389 | 0.0442 |
|  | (0.0792) | (0.0793) | (0.0793) | (0.0794) | (0.0943) | (0.0948) | (0.0949) | (0.144) | (0.144) | (0.144) |
| Age (logged) |  | -0.286** | -0.231* | -0.287** |  | -0.309** | -0.199 |  | -0.195 | -0.262 |
|  |  | (0.117) | (0.122) | (0.142) |  | (0.142) | (0.147) |  | (0.207) | (0.222) |
| Treatment*Age (logged) |  |  | -0.227 | -0.408 |  |  | -0.430* |  |  | 0.328 |
|  |  |  | (0.210) | (0.250) |  |  | (0.247) |  |  | (0.397) |
| Gender |  |  |  |  |  |  |  |  |  |  |
| *Female* |  | 0.188** | 0.192** | -0.521 |  |  |  |  |  |  |
|  |  | (0.0736) | (0.0785) | (0.859) |  |  |  |  |  |  |
| Treatment*Female |  |  | -0.0219 | -2.857* |  |  |  |  |  |  |
|  |  |  | (0.140) | (1.704) |  |  |  |  |  |  |
| Age (logged)*Female |  |  |  | 0.191 |  |  |  |  |  |  |
|  |  |  |  | (0.234) |  |  |  |  |  |  |
| Treatment*Age (logged)*Female |  |  |  | 0.755* |  |  |  |  |  |  |
|  |  |  |  | (0.456) |  |  |  |  |  |  |
| Controls Included | Yes | Yes | Yes | Yes | Yes | Yes | Yes | Yes | Yes | Yes |
| Time fixed effects | Yes | Yes | Yes | Yes | Yes | Yes | Yes | Yes | Yes | Yes |
|  |  |  |  |  |  |  |  |  |  |  |
| Wald-Chi2 |  |  |  |  | 2461.10*** | 2471.77*** | 2480.01*** | 345.97*** | 322.34*** | 328.31*** |
| Pseudo R2 | 0.0177 | 0.0185 | 0.0186 | 0.0189 | 0.0179 | 0.0184 | 0.0187 | 0.0350 | 0.0352 | 0.0353 |
| Observations | 9,680 | 9,680 | 9,680 | 9,680 | 6,971 | 6,971 | 6,971 | 2,709 | 2,709 | 2,709 |

Clustered standard errors in parentheses[[5]](#footnote-5)

*** p<0.01, ** p<0.05, * p<0.1

## Appendix D: OLS Estimations

Table 10: Satisfaction with Life, Ols

|  | Full Sample | | | | Male Sub-Sample | | | Female Sub-Sample | | |
| --- | --- | --- | --- | --- | --- | --- | --- | --- | --- | --- |
|  | (1) | (2) | (3) | (4) | (5) | (6) | (7) | (8) | (9) | (10) |
| VARIABLES | Controls | Baseline Model | Two Way Interaction | Three Way Interaction | Controls | Baseline Model | Two Way Interaction | Controls | Baseline Model | Two Way Interaction |
|  |  |  |  |  |  |  |  |  |  |  |
| Treatment | 0.0198 | 0.0271 | -0.204 | -0.0879 | -0.0412 | -0.0354 | -0.148 | 0.152** | 0.165** | 0.0291 |
|  | (0.0431) | (0.0429) | (0.495) | (0.590) | (0.0512) | (0.0511) | (0.588) | (0.0762) | (0.0760) | (0.899) |
| Pre-Treatment | -0.0178 | -0.0292 | -0.0301 | -0.0300 | 0.0129 | 0.00317 | 0.00270 | -0.0911 | -0.117 | -0.117 |
|  | (0.0460) | (0.0460) | (0.0461) | (0.0461) | (0.0542) | (0.0543) | (0.0545) | (0.0853) | (0.0851) | (0.0852) |
| Post Treatment | -0.0226 | -0.0142 | -0.0135 | -0.0136 | -0.0392 | -0.0333 | -0.0328 | 0.00110 | 0.00880 | 0.00941 |
|  | (0.0578) | (0.0576) | (0.0576) | (0.0576) | (0.0665) | (0.0665) | (0.0665) | (0.115) | (0.113) | (0.113) |
| Age (logged) |  | -0.313*** | -0.325*** | -0.297*** |  | -0.265*** | -0.273*** |  | -0.496*** | -0.503*** |
|  |  | (0.0848) | (0.0884) | (0.0997) |  | (0.101) | (0.103) |  | (0.154) | (0.164) |
| Treatment*Age (logged) |  |  | 0.0480 | 0.0168 |  |  | 0.0302 |  |  | 0.0365 |
|  |  |  | (0.133) | (0.158) |  |  | (0.157) |  |  | (0.240) |
| Gender |  |  |  |  |  |  |  |  |  |  |
| *Female* |  | 0.107** | 0.0621 | 0.404 |  |  |  |  |  |  |
|  |  | (0.0542) | (0.0581) | (0.620) |  |  |  |  |  |  |
| Treatment*Female |  |  | 0.198** | -0.203 |  |  |  |  |  |  |
|  |  |  | (0.0827) | (1.071) |  |  |  |  |  |  |
| Age (logged)*Female |  |  |  | -0.0921 |  |  |  |  |  |  |
|  |  |  |  | (0.170) |  |  |  |  |  |  |
| Treatment*Age (logged)*Female |  |  |  | 0.108 |  |  |  |  |  |  |
|  |  |  |  | (0.287) |  |  |  |  |  |  |
| Controls Included | Yes | Yes | Yes | Yes | Yes | Yes | Yes | Yes | Yes | Yes |
| Time fixed effects | Yes | Yes | Yes | Yes | Yes | Yes | Yes | Yes | Yes | Yes |
|  |  |  |  |  |  |  |  |  |  |  |
| F-Test |  |  |  |  |  |  |  |  |  |  |
| R-squared | 0.038 | 0.042 | 0.043 | 0.043 | 0.043 | 0.045 | 0.045 | 0.078 | 0.085 | 0.085 |
| Observations | 9,689 | 9,689 | 9,689 | 9,689 | 6,978 | 6,978 | 6,978 | 2,711 | 2,711 | 2,711 |

Clustered standard errors in parentheses[[6]](#footnote-6)

*** p<0.01, ** p<0.05, * p<0.1

Table 11: Satisfaction with Job, Ols

|  | Full Sample | | | | Male Sub-Sample | | | Female Sub-Sample | | |
| --- | --- | --- | --- | --- | --- | --- | --- | --- | --- | --- |
|  | (1) | (2) | (3) | (4) | (5) | (6) | (7) | (8) | (9) | (10) |
| VARIABLES | Controls | Baseline Model | Two Way Interaction | Three Way Interaction | Controls | Baseline Model | Two Way Interaction | Controls | Baseline Model | Two Way Interaction |
|  |  |  |  |  |  |  |  |  |  |  |
| Treatment | 0.326*** | 0.329*** | 0.601 | 1.094* | 0.334*** | 0.337*** | 1.127* | 0.275*** | 0.279*** | -1.004 |
|  | (0.0437) | (0.0436) | (0.515) | (0.625) | (0.0510) | (0.0509) | (0.623) | (0.0796) | (0.0798) | (0.844) |
| Pre-Treatment | -0.258*** | -0.264*** | -0.263*** | -0.262*** | -0.260*** | -0.267*** | -0.264*** | -0.250** | -0.257*** | -0.260*** |
|  | (0.0532) | (0.0532) | (0.0533) | (0.0534) | (0.0642) | (0.0642) | (0.0643) | (0.0971) | (0.0974) | (0.0975) |
| Post Treatment | 0.0310 | 0.0366 | 0.0354 | 0.0358 | 0.0274 | 0.0314 | 0.0273 | 0.00575 | 0.00778 | 0.0135 |
|  | (0.0577) | (0.0576) | (0.0576) | (0.0577) | (0.0698) | (0.0699) | (0.0700) | (0.0996) | (0.0988) | (0.0989) |
| Age (logged) |  | -0.169** | -0.152* | -0.168* |  | -0.182* | -0.126 |  | -0.132 | -0.203 |
|  |  | (0.0794) | (0.0861) | (0.100) |  | (0.0969) | (0.105) |  | (0.136) | (0.149) |
| Treatment*Age (logged) |  |  | -0.0691 | -0.201 |  |  | -0.212 |  |  | 0.344 |
|  |  |  | (0.138) | (0.168) |  |  | (0.168) |  |  | (0.224) |
| Gender |  |  |  |  |  |  |  |  |  |  |
| *Female* |  | 0.133** | 0.145** | -0.0779 |  |  |  |  |  |  |
|  |  | (0.0519) | (0.0568) | (0.600) |  |  |  |  |  |  |
| Treatment*Female |  |  | -0.0535 | -2.101** |  |  |  |  |  |  |
|  |  |  | (0.0914) | (1.059) |  |  |  |  |  |  |
| Age (logged)*Female |  |  |  | 0.0594 |  |  |  |  |  |  |
|  |  |  |  | (0.164) |  |  |  |  |  |  |
| Treatment*Age (logged)*Female |  |  |  | 0.547* |  |  |  |  |  |  |
|  |  |  |  | (0.284) |  |  |  |  |  |  |
| Controls Included | Yes | Yes | Yes | Yes | Yes | Yes | Yes | Yes | Yes | Yes |
| Time fixed effects | Yes | Yes | Yes | Yes | Yes | Yes | Yes | Yes | Yes | Yes |
|  |  |  |  |  |  |  |  |  |  |  |
| F-Test |  |  |  |  |  |  |  |  |  |  |
| R-squared | 0.051 | 0.053 | 0.053 | 0.054 | 0.054 | 0.055 | 0.055 | 0.090 | 0.090 | 0.091 |
| Observations | 9,680 | 9,680 | 9,680 | 9,680 | 6,971 | 6,971 | 6,971 | 2,709 | 2,709 | 2,709 |

Clustered standard errors in parentheses[[7]](#footnote-7)

*** p<0.01, ** p<0.05, * p<0.1

Table 12: Satisfaction with Income, Ols

|  | Full Sample | | | | Male Sub-Sample | | | Female Sub-Sample | | |
| --- | --- | --- | --- | --- | --- | --- | --- | --- | --- | --- |
|  | (1) | (2) | (3) | (4) | (5) | (6) | (7) | (8) | (9) | (10) |
| VARIABLES | Controls | Baseline Model | Two Way Interaction | Three Way Interaction | Controls | Baseline Model | Two Way Interaction | Controls | Baseline Model | Two Way Interaction |
|  |  |  |  |  |  |  |  |  |  |  |
| Treatment | 0.00189 | 0.00414 | 0.00194 | 0.141 | -0.0219 | -0.0210 | 0.149 | -0.00374 | 0.00228 | -0.230 |
|  | (0.0496) | (0.0495) | (0.575) | (0.649) | (0.0572) | (0.0572) | (0.645) | (0.0964) | (0.0962) | (1.218) |
| Pre-Treatment | -0.0195 | -0.0213 | -0.0213 | -0.0212 | -0.00738 | -0.00877 | -0.00805 | -0.0537 | -0.0657 | -0.0663 |
|  | (0.0530) | (0.0530) | (0.0532) | (0.0532) | (0.0632) | (0.0631) | (0.0634) | (0.0986) | (0.0987) | (0.0989) |
| Post Treatment | -0.00408 | 0.00125 | 0.00117 | 0.00123 | -0.0847 | -0.0839 | -0.0848 | 0.180 | 0.184 | 0.185 |
|  | (0.0677) | (0.0674) | (0.0676) | (0.0676) | (0.0810) | (0.0813) | (0.0814) | (0.112) | (0.113) | (0.114) |
| Age (logged) |  | -0.0992 | -0.0986 | -0.0965 |  | -0.0381 | -0.0260 |  | -0.234 | -0.247 |
|  |  | (0.101) | (0.108) | (0.121) |  | (0.119) | (0.127) |  | (0.188) | (0.198) |
| Treatment*Age (logged) |  |  | -0.00179 | -0.0392 |  |  | -0.0456 |  |  | 0.0623 |
|  |  |  | (0.155) | (0.175) |  |  | (0.174) |  |  | (0.328) |
| Gender |  |  |  |  |  |  |  |  |  |  |
| *Female* |  | 0.217*** | 0.209*** | 0.232 |  |  |  |  |  |  |
|  |  | (0.0665) | (0.0704) | (0.769) |  |  |  |  |  |  |
| Treatment*Female |  |  | 0.0340 | -0.526 |  |  |  |  |  |  |
|  |  |  | (0.105) | (1.360) |  |  |  |  |  |  |
| Age (logged)*Female |  |  |  | -0.00615 |  |  |  |  |  |  |
|  |  |  |  | (0.208) |  |  |  |  |  |  |
| Treatment*Age (logged)*Female |  |  |  | 0.150 |  |  |  |  |  |  |
|  |  |  |  | (0.368) |  |  |  |  |  |  |
| Controls Included | Yes | Yes | Yes | Yes | Yes | Yes | Yes | Yes | Yes | Yes |
| Time fixed effects | Yes | Yes | Yes | Yes | Yes | Yes | Yes | Yes | Yes | Yes |
|  |  |  |  |  |  |  |  |  |  |  |
| F-Test |  |  |  |  |  |  |  |  |  |  |
| R-squared | 0.065 | 0.068 | 0.068 | 0.068 | 0.075 | 0.075 | 0.075 | 0.097 | 0.098 | 0.098 |
| Observations | 9,686 | 9,686 | 9,686 | 9,686 | 6,975 | 6,975 | 6,975 | 2,711 | 2,711 | 2,711 |

Clustered standard errors in parentheses[[8]](#footnote-8)

*** p<0.01, ** p<0.05, * p<0.1

Table 13: Satisfaction with Leisure Time, Ols

|  | Full Sample | | | | Male Sub-Sample | | | Female Sub-Sample | | |
| --- | --- | --- | --- | --- | --- | --- | --- | --- | --- | --- |
|  | (1) | (2) | (3) | (4) | (5) | (6) | (7) | (8) | (9) | (10) |
| VARIABLES | Controls | Baseline Model | Two Way Interaction | Three Way Interaction | Controls | Baseline Model | Two Way Interaction | Controls | Baseline Model | Two Way Interaction |
|  |  |  |  |  |  |  |  |  |  |  |
| Treatment | 0.134** | 0.134** | -0.113 | 0.161 | 0.0548 | 0.0509 | 0.109 | 0.266*** | 0.278*** | -0.0524 |
|  | (0.0522) | (0.0522) | (0.626) | (0.710) | (0.0599) | (0.0599) | (0.701) | (0.0999) | (0.100) | (1.312) |
| Pre-Treatment | -0.0472 | -0.0471 | -0.0481 | -0.0480 | -0.0298 | -0.0233 | -0.0230 | -0.0955 | -0.119 | -0.120 |
|  | (0.0518) | (0.0517) | (0.0518) | (0.0518) | (0.0607) | (0.0606) | (0.0609) | (0.0979) | (0.0969) | (0.0970) |
| Post Treatment | -0.0551 | -0.0561 | -0.0556 | -0.0562 | -0.0747 | -0.0786 | -0.0789 | -0.0855 | -0.0784 | -0.0769 |
|  | (0.0655) | (0.0655) | (0.0655) | (0.0657) | (0.0737) | (0.0736) | (0.0736) | (0.129) | (0.129) | (0.129) |
| Age (logged) |  | 0.0140 | 0.00316 | 0.106 |  | 0.178 | 0.182 |  | -0.459** | -0.477** |
|  |  | (0.104) | (0.109) | (0.121) |  | (0.120) | (0.125) |  | (0.192) | (0.202) |
| Treatment*Age (logged) |  |  | 0.0477 | -0.0265 |  |  | -0.0156 |  |  | 0.0886 |
|  |  |  | (0.167) | (0.190) |  |  | (0.188) |  |  | (0.352) |
| Gender |  |  |  |  |  |  |  |  |  |  |
| *Female* |  | -0.0481 | -0.108 | 1.190 |  |  |  |  |  |  |
|  |  | (0.0676) | (0.0715) | (0.781) |  |  |  |  |  |  |
| Treatment*Female |  |  | 0.264** | -0.588 |  |  |  |  |  |  |
|  |  |  | (0.112) | (1.474) |  |  |  |  |  |  |
| Age (logged)*Female |  |  |  | -0.349* |  |  |  |  |  |  |
|  |  |  |  | (0.212) |  |  |  |  |  |  |
| Treatment*Age (logged)*Female |  |  |  | 0.230 |  |  |  |  |  |  |
|  |  |  |  | (0.397) |  |  |  |  |  |  |
| Controls Included | Yes | Yes | Yes | Yes | Yes | Yes | Yes | Yes | Yes | Yes |
| Time fixed effects | Yes | Yes | Yes | Yes | Yes | Yes | Yes | Yes | Yes | Yes |
|  |  |  |  |  |  |  |  |  |  |  |
| F-Test |  |  |  |  |  |  |  |  |  |  |
| R-squared | 0.059 | 0.059 | 0.060 | 0.061 | 0.067 | 0.068 | 0.068 | 0.100 | 0.104 | 0.104 |
| Observations | 9,687 | 9,687 | 9,687 | 9,687 | 6,976 | 6,976 | 6,976 | 2,711 | 2,711 | 2,711 |

Clustered standard errors in parentheses[[9]](#footnote-9)

*** p<0.01, ** p<0.05, * p<0.1

Table 14: Satisfaction with Health, Ols

|  | Full Sample | | | | Male Sub-Sample | | | Female Sub-Sample | | |
| --- | --- | --- | --- | --- | --- | --- | --- | --- | --- | --- |
|  | (1) | (2) | (3) | (4) | (5) | (6) | (7) | (8) | (9) | (10) |
| VARIABLES | Controls | Baseline Model | Two Way Interaction | Three Way Interaction | Controls | Baseline Model | Two Way Interaction | Controls | Baseline Model | Two Way Interaction |
|  |  |  |  |  |  |  |  |  |  |  |
| Treatment | 0.0717 | 0.0805 | 0.692 | 1.027 | 0.0140 | 0.0228 | 0.953 | 0.180* | 0.190* | 0.277 |
|  | (0.0500) | (0.0497) | (0.587) | (0.675) | (0.0572) | (0.0567) | (0.671) | (0.0975) | (0.0973) | (1.187) |
| Pre-Treatment | -0.0655 | -0.0799 | -0.0776 | -0.0774 | -0.0799 | -0.0947 | -0.0908 | -0.0532 | -0.0734 | -0.0732 |
|  | (0.0572) | (0.0571) | (0.0572) | (0.0572) | (0.0685) | (0.0686) | (0.0687) | (0.106) | (0.106) | (0.106) |
| Post Treatment | -0.0157 | -0.00620 | -0.00967 | -0.00954 | -0.0331 | -0.0242 | -0.0290 | -0.0155 | -0.00953 | -0.00992 |
|  | (0.0651) | (0.0658) | (0.0658) | (0.0659) | (0.0774) | (0.0780) | (0.0781) | (0.120) | (0.121) | (0.121) |
| Age (logged) |  | -0.381*** | -0.336*** | -0.329*** |  | -0.405*** | -0.339*** |  | -0.385** | -0.380** |
|  |  | (0.0995) | (0.106) | (0.122) |  | (0.119) | (0.127) |  | (0.180) | (0.188) |
| Treatment*Age (logged) |  |  | -0.175 | -0.265 |  |  | -0.250 |  |  | -0.0234 |
|  |  |  | (0.158) | (0.182) |  |  | (0.180) |  |  | (0.317) |
| Gender |  |  |  |  |  |  |  |  |  |  |
| *Female* |  | 0.0694 | 0.0307 | 0.119 |  |  |  |  |  |  |
|  |  | (0.0661) | (0.0703) | (0.791) |  |  |  |  |  |  |
| Treatment*Female |  |  | 0.164 | -1.176 |  |  |  |  |  |  |
|  |  |  | (0.104) | (1.356) |  |  |  |  |  |  |
| Age (logged)*Female |  |  |  | -0.0239 |  |  |  |  |  |  |
|  |  |  |  | (0.213) |  |  |  |  |  |  |
| Treatment*Age (logged)*Female |  |  |  | 0.359 |  |  |  |  |  |  |
|  |  |  |  | (0.363) |  |  |  |  |  |  |
| Controls Included | Yes | Yes | Yes | Yes | Yes | Yes | Yes | Yes | Yes | Yes |
| Time fixed effects | Yes | Yes | Yes | Yes | Yes | Yes | Yes | Yes | Yes | Yes |
|  |  |  |  |  |  |  |  |  |  |  |
| F-Test |  |  |  |  |  |  |  |  |  |  |
| R-squared | 0.032 | 0.036 | 0.036 | 0.036 | 0.042 | 0.045 | 0.045 | 0.061 | 0.064 | 0.064 |
| Observations | 9,682 | 9,682 | 9,682 | 9,682 | 6,975 | 6,975 | 6,975 | 2,707 | 2,707 | 2,707 |

Clustered standard errors in parentheses[[10]](#footnote-10)

*** p<0.01, ** p<0.05, * p<0.1

## Appendix E: Models with Age2 Term Included

*Table 2: Satisfaction with Life, Ologit*

|  | Full Sample | | | | Male Sub-Sample | | | Female Sub-Sample | | |
| --- | --- | --- | --- | --- | --- | --- | --- | --- | --- | --- |
|  | (1) | (2) | (3) | (4) | (5) | (6) | (7) | (8) | (9) | (10) |
| VARIABLES | Controls | Baseline Model | Two Way Interaction | Three Way Interaction | Controls | Baseline Model | Two Way Interaction | Controls | Baseline Model | Two Way Interaction |
|  |  |  |  |  |  |  |  |  |  |  |
| Treatment | 0.0489 | 0.0609 | -0.229 | -0.219 | -0.0319 | -0.0228 | -0.313 | 0.216* | 0.243** | 0.528 |
|  | (0.0617) | (0.0619) | (0.756) | (0.879) | (0.0730) | (0.0731) | (0.891) | (0.117) | (0.117) | (1.471) |
| Pre-Treatment | -0.00886 | -0.0332 | -0.0339 | -0.0339 | 0.0539 | 0.0326 | 0.0314 | -0.154 | -0.196* | -0.195* |
|  | (0.0650) | (0.0655) | (0.0657) | (0.0657) | (0.0786) | (0.0791) | (0.0795) | (0.119) | (0.118) | (0.118) |
| Post Treatment | -0.0280 | -0.0128 | -0.0119 | -0.0118 | -0.0616 | -0.0474 | -0.0459 | 0.0107 | 0.0156 | 0.0142 |
|  | (0.0809) | (0.0814) | (0.0814) | (0.0814) | (0.0974) | (0.0981) | (0.0979) | (0.152) | (0.153) | (0.152) |
| Age (logged) |  | -9.476*** | -9.532*** | -9.539*** |  | -9.317*** | -9.295*** |  | -9.723* | -9.736* |
|  |  | (2.480) | (2.479) | (2.486) |  | (2.908) | (2.907) |  | (5.057) | (5.065) |
| Age2 (logged) |  | 1.233*** | 1.238*** | 1.239*** |  | 1.213*** | 1.207*** |  | 1.246* | 1.250* |
|  |  | (0.340) | (0.340) | (0.340) |  | (0.398) | (0.398) |  | (0.696) | (0.698) |
| Treatment*Age (logged) |  |  | 0.0602 | 0.0576 |  |  | 0.0778 |  |  | -0.0762 |
|  |  |  | (0.202) | (0.235) |  |  | (0.238) |  |  | (0.391) |
| Gender |  |  |  |  |  |  |  |  |  |  |
| *Female* |  | 0.175** | 0.117 | 0.0882 |  |  |  |  |  |  |
|  |  | (0.0819) | (0.0873) | (0.981) |  |  |  |  |  |  |
| Treatment*Female |  |  | 0.257** | 0.211 |  |  |  |  |  |  |
|  |  |  | (0.127) | (1.721) |  |  |  |  |  |  |
| Age (logged)*Female |  |  |  | 0.00774 |  |  |  |  |  |  |
|  |  |  |  | (0.266) |  |  |  |  |  |  |
| Treatment*Age (logged)*Female |  |  |  | 0.0122 |  |  |  |  |  |  |
|  |  |  |  | (0.460) |  |  |  |  |  |  |
| Controls Included | Yes | Yes | Yes | Yes | Yes | Yes | Yes | Yes | Yes | Yes |
| Time fixed effects | Yes | Yes | Yes | Yes | Yes | Yes | Yes | Yes | Yes | Yes |
|  |  |  |  |  |  |  |  |  |  |  |
| Wald-Chi2 |  |  |  |  |  |  |  |  |  |  |
| Pseudo R2 |  |  |  |  |  |  |  |  |  |  |
| Observations | 9,689 | 9,689 | 9,689 | 9,689 | 6,978 | 6,978 | 6,978 | 2,711 | 2,711 | 2,711 |

Clustered standard errors in parentheses[[11]](#footnote-11)

*** p<0.01, ** p<0.05, * p<0.1

*Table 2: Satisfaction with Job, Ologit*

|  | Full Sample | | | | Male Sub-Sample | | | Female Sub-Sample | | |
| --- | --- | --- | --- | --- | --- | --- | --- | --- | --- | --- |
|  | (1) | (2) | (3) | (4) | (5) | (6) | (7) | (8) | (9) | (10) |
| VARIABLES | Controls | Baseline Model | Two Way Interaction | Three Way Interaction | Controls | Baseline Model | Two Way Interaction | Controls | Baseline Model | Two Way Interaction |
|  |  |  |  |  |  |  |  |  |  |  |
| Treatment | 0.492*** | 0.502*** | 1.524* | 2.240** | 0.491*** | 0.499*** | 2.293** | 0.473*** | 0.486*** | -0.614 |
|  | (0.0648) | (0.0650) | (0.805) | (0.959) | (0.0746) | (0.0748) | (0.946) | (0.131) | (0.131) | (1.526) |
| Pre-Treatment | -0.273*** | -0.287*** | -0.283*** | -0.282*** | -0.273*** | -0.288*** | -0.281*** | -0.282** | -0.297** | -0.301** |
|  | (0.0700) | (0.0704) | (0.0705) | (0.0707) | (0.0841) | (0.0845) | (0.0845) | (0.136) | (0.136) | (0.137) |
| Post Treatment | 0.0534 | 0.0608 | 0.0557 | 0.0569 | 0.0480 | 0.0571 | 0.0474 | 0.0381 | 0.0310 | 0.0358 |
|  | (0.0792) | (0.0793) | (0.0793) | (0.0794) | (0.0943) | (0.0948) | (0.0949) | (0.144) | (0.143) | (0.143) |
| Age (logged) |  | -8.132*** | -8.233*** | -8.501*** |  | -7.302*** | -7.522*** |  | -10.61** | -10.54** |
|  |  | (2.387) | (2.394) | (2.406) |  | (2.777) | (2.791) |  | (5.016) | (5.025) |
| Age2 (logged) |  | 1.077*** | 1.100*** | 1.128*** |  | 0.958** | 1.005*** |  | 1.434** | 1.416** |
|  |  | (0.328) | (0.330) | (0.331) |  | (0.381) | (0.383) |  | (0.692) | (0.695) |
| Treatment*Age (logged) |  |  | -0.273 | -0.464* |  |  | -0.481* |  |  | 0.294 |
|  |  |  | (0.215) | (0.256) |  |  | (0.252) |  |  | (0.404) |
| Gender |  |  |  |  |  |  |  |  |  |  |
| *Female* |  | 0.172** | 0.174** | -0.608 |  |  |  |  |  |  |
|  |  | (0.0735) | (0.0782) | (0.862) |  |  |  |  |  |  |
| Treatment*Female |  |  | -0.0170 | -2.992* |  |  |  |  |  |  |
|  |  |  | (0.140) | (1.726) |  |  |  |  |  |  |
| Age (logged)*Female |  |  |  | 0.209 |  |  |  |  |  |  |
|  |  |  |  | (0.235) |  |  |  |  |  |  |
| Treatment*Age (logged)*Female |  |  |  | 0.792* |  |  |  |  |  |  |
|  |  |  |  | (0.461) |  |  |  |  |  |  |
| Controls Included | Yes | Yes | Yes | Yes | Yes | Yes | Yes | Yes | Yes | Yes |
| Time fixed effects | Yes | Yes | Yes | Yes | Yes | Yes | Yes | Yes | Yes | Yes |
|  |  |  |  |  |  |  |  |  |  |  |
| Wald-Chi2 |  |  |  |  |  |  |  |  |  |  |
| Pseudo R2 |  |  |  |  |  |  |  |  |  |  |
| Observations | 9,680 | 9,680 | 9,680 | 9,680 | 6,971 | 6,971 | 6,971 | 2,709 | 2,709 | 2,709 |

Clustered standard errors in parentheses[[12]](#footnote-12)

*** p<0.01, ** p<0.05, * p<0.1

*Table 2: Satisfaction with Income, Ologit*

|  | Full Sample | | | | Male Sub-Sample | | | Female Sub-Sample | | |
| --- | --- | --- | --- | --- | --- | --- | --- | --- | --- | --- |
|  | (1) | (2) | (3) | (4) | (5) | (6) | (7) | (8) | (9) | (10) |
| VARIABLES | Controls | Baseline Model | Two Way Interaction | Three Way Interaction | Controls | Baseline Model | Two Way Interaction | Controls | Baseline Model | Two Way Interaction |
|  |  |  |  |  |  |  |  |  |  |  |
| Treatment | 0.00125 | 0.00263 | 0.0828 | 0.176 | -0.0295 | -0.0314 | 0.265 | 0.0120 | 0.0219 | -0.0413 |
|  | (0.0595) | (0.0598) | (0.711) | (0.790) | (0.0692) | (0.0695) | (0.812) | (0.121) | (0.121) | (1.513) |
| Pre-Treatment | -0.0166 | -0.0276 | -0.0271 | -0.0267 | 0.00490 | -0.00388 | -0.00248 | -0.0990 | -0.116 | -0.116 |
|  | (0.0625) | (0.0625) | (0.0628) | (0.0628) | (0.0774) | (0.0772) | (0.0775) | (0.113) | (0.113) | (0.114) |
| Post Treatment | -0.00120 | 0.00473 | 0.00412 | 0.00460 | -0.101 | -0.0995 | -0.101 | 0.242* | 0.243* | 0.244* |
|  | (0.0817) | (0.0818) | (0.0820) | (0.0820) | (0.0965) | (0.0973) | (0.0976) | (0.145) | (0.146) | (0.146) |
| Age (logged) |  | -12.26*** | -12.28*** | -12.35*** |  | -13.75*** | -13.77*** |  | -6.599 | -6.595 |
|  |  | (2.399) | (2.398) | (2.396) |  | (2.766) | (2.766) |  | (5.302) | (5.311) |
| Age2 (logged) |  | 1.672*** | 1.676*** | 1.682*** |  | 1.884*** | 1.889*** |  | 0.880 | 0.879 |
|  |  | (0.329) | (0.329) | (0.329) |  | (0.380) | (0.380) |  | (0.730) | (0.732) |
| Treatment*Age (logged) |  |  | -0.0252 | -0.0500 |  |  | -0.0795 |  |  | 0.0170 |
|  |  |  | (0.192) | (0.214) |  |  | (0.219) |  |  | (0.408) |
| Gender |  |  |  |  |  |  |  |  |  |  |
| *Female* |  | 0.271*** | 0.259*** | -0.137 |  |  |  |  |  |  |
|  |  | (0.0844) | (0.0886) | (0.986) |  |  |  |  |  |  |
| Treatment*Female |  |  | 0.0550 | -0.426 |  |  |  |  |  |  |
|  |  |  | (0.132) | (1.742) |  |  |  |  |  |  |
| Age (logged)*Female |  |  |  | 0.107 |  |  |  |  |  |  |
|  |  |  |  | (0.267) |  |  |  |  |  |  |
| Treatment*Age (logged)*Female |  |  |  | 0.128 |  |  |  |  |  |  |
|  |  |  |  | (0.471) |  |  |  |  |  |  |
| Controls Included | Yes | Yes | Yes | Yes | Yes | Yes | Yes | Yes | Yes | Yes |
| Time fixed effects | Yes | Yes | Yes | Yes | Yes | Yes | Yes | Yes | Yes | Yes |
|  |  |  |  |  |  |  |  |  |  |  |
| Wald-Chi2 |  |  |  |  |  |  |  |  |  |  |
| Pseudo R2 |  |  |  |  |  |  |  |  |  |  |
| Observations | 9,686 | 9,686 | 9,686 | 9,686 | 6,975 | 6,975 | 6,975 | 2,711 | 2,711 | 2,711 |

Clustered standard errors in parentheses[[13]](#footnote-13)

*** p<0.01, ** p<0.05, * p<0.1

*Table 2: Satisfaction with Free time, Ologit*

|  | Full Sample | | | | Male Sub-Sample | | | Female Sub-Sample | | |
| --- | --- | --- | --- | --- | --- | --- | --- | --- | --- | --- |
|  | (1) | (2) | (3) | (4) | (5) | (6) | (7) | (8) | (9) | (10) |
| VARIABLES | Controls | Baseline Model | Two Way Interaction | Three Way Interaction | Controls | Baseline Model | Two Way Interaction | Controls | Baseline Model | Two Way Interaction |
|  |  |  |  |  |  |  |  |  |  |  |
| Treatment | 0.173*** | 0.177*** | 0.0942 | 0.339 | 0.0729 | 0.0716 | 0.273 | 0.328*** | 0.358*** | 0.525 |
|  | (0.0632) | (0.0634) | (0.773) | (0.856) | (0.0737) | (0.0738) | (0.867) | (0.123) | (0.124) | (1.749) |
| Pre-Treatment | -0.0632 | -0.0688 | -0.0696 | -0.0684 | -0.0487 | -0.0480 | -0.0472 | -0.130 | -0.155 | -0.155 |
|  | (0.0610) | (0.0608) | (0.0610) | (0.0610) | (0.0724) | (0.0723) | (0.0726) | (0.116) | (0.115) | (0.115) |
| Post Treatment | -0.0572 | -0.0583 | -0.0589 | -0.0598 | -0.0882 | -0.0852 | -0.0862 | -0.0796 | -0.0788 | -0.0796 |
|  | (0.0778) | (0.0779) | (0.0779) | (0.0783) | (0.0896) | (0.0897) | (0.0897) | (0.153) | (0.154) | (0.154) |
| Age (logged) |  | -12.28*** | -12.42*** | -12.21*** |  | -12.55*** | -12.57*** |  | -11.34** | -11.36** |
|  |  | (2.375) | (2.380) | (2.396) |  | (2.829) | (2.829) |  | (4.773) | (4.821) |
| Age2 (logged) |  | 1.690*** | 1.710*** | 1.694*** |  | 1.751*** | 1.754*** |  | 1.495** | 1.499** |
|  |  | (0.326) | (0.327) | (0.328) |  | (0.388) | (0.388) |  | (0.661) | (0.670) |
| Treatment*Age (logged) |  |  | -0.00180 | -0.0680 |  |  | -0.0540 |  |  | -0.0447 |
|  |  |  | (0.207) | (0.229) |  |  | (0.232) |  |  | (0.469) |
| Gender |  |  |  |  |  |  |  |  |  |  |
| *Female* |  | -0.0680 | -0.146* | 1.063 |  |  |  |  |  |  |
|  |  | (0.0815) | (0.0850) | (0.942) |  |  |  |  |  |  |
| Treatment*Female |  |  | 0.356** | -0.357 |  |  |  |  |  |  |
|  |  |  | (0.139) | (1.935) |  |  |  |  |  |  |
| Age (logged)*Female |  |  |  | -0.325 |  |  |  |  |  |  |
|  |  |  |  | (0.255) |  |  |  |  |  |  |
| Treatment*Age (logged)*Female |  |  |  | 0.194 |  |  |  |  |  |  |
|  |  |  |  | (0.519) |  |  |  |  |  |  |
| Controls Included | Yes | Yes | Yes | Yes | Yes | Yes | Yes | Yes | Yes | Yes |
| Time fixed effects | Yes | Yes | Yes | Yes | Yes | Yes | Yes | Yes | Yes | Yes |
|  |  |  |  |  |  |  |  |  |  |  |
| Wald-Chi2 |  |  |  |  |  |  |  |  |  |  |
| Pseudo R2 |  |  |  |  |  |  |  |  |  |  |
| Observations | 9,687 | 9,687 | 9,687 | 9,687 | 6,976 | 6,976 | 6,976 | 2,711 | 2,711 | 2,711 |

Clustered standard errors in parentheses[[14]](#footnote-14)

*** p<0.01, ** p<0.05, * p<0.1

*Table 2: Satisfaction with Health, Ologit*

|  | Full Sample | | | | Male Sub-Sample | | | Female Sub-Sample | | |
| --- | --- | --- | --- | --- | --- | --- | --- | --- | --- | --- |
|  | (1) | (2) | (3) | (4) | (5) | (6) | (7) | (8) | (9) | (10) |
| VARIABLES | Controls | Baseline Model | Two Way Interaction | Three Way Interaction | Controls | Baseline Model | Two Way Interaction | Controls | Baseline Model | Two Way Interaction |
|  |  |  |  |  |  |  |  |  |  |  |
| Treatment | 0.111* | 0.123** | 1.289* | 1.552* | 0.0447 | 0.0538 | 1.457 | 0.240** | 0.261** | 1.338 |
|  | (0.0600) | (0.0598) | (0.769) | (0.886) | (0.0694) | (0.0690) | (0.897) | (0.120) | (0.120) | (1.541) |
| Pre-Treatment | -0.0675 | -0.0927 | -0.0881 | -0.0880 | -0.0818 | -0.107 | -0.101 | -0.0728 | -0.102 | -0.0989 |
|  | (0.0674) | (0.0678) | (0.0679) | (0.0679) | (0.0822) | (0.0829) | (0.0830) | (0.127) | (0.128) | (0.128) |
| Post Treatment | -0.0159 | -0.00361 | -0.00996 | -0.00966 | -0.0266 | -0.0100 | -0.0182 | -0.0662 | -0.0690 | -0.0735 |
|  | (0.0759) | (0.0770) | (0.0770) | (0.0770) | (0.0928) | (0.0940) | (0.0940) | (0.132) | (0.136) | (0.136) |
| Age (logged) |  | -6.953*** | -7.139*** | -7.214*** |  | -5.965** | -6.113** |  | -9.966** | -10.04** |
|  |  | (2.431) | (2.437) | (2.445) |  | (2.808) | (2.813) |  | (5.035) | (5.031) |
| Age2 (logged) |  | 0.888*** | 0.924*** | 0.932*** |  | 0.746* | 0.780** |  | 1.307* | 1.325* |
|  |  | (0.332) | (0.333) | (0.334) |  | (0.383) | (0.384) |  | (0.690) | (0.690) |
| Treatment*Age (logged) |  |  | -0.328 | -0.398* |  |  | -0.376 |  |  | -0.288 |
|  |  |  | (0.205) | (0.236) |  |  | (0.239) |  |  | (0.409) |
| Gender |  |  |  |  |  |  |  |  |  |  |
| *Female* |  | 0.0971 | 0.0424 | -0.132 |  |  |  |  |  |  |
|  |  | (0.0800) | (0.0841) | (0.977) |  |  |  |  |  |  |
| Treatment*Female |  |  | 0.242* | -0.941 |  |  |  |  |  |  |
|  |  |  | (0.131) | (1.817) |  |  |  |  |  |  |
| Age (logged)*Female |  |  |  | 0.0466 |  |  |  |  |  |  |
|  |  |  |  | (0.262) |  |  |  |  |  |  |
| Treatment*Age (logged)*Female |  |  |  | 0.315 |  |  |  |  |  |  |
|  |  |  |  | (0.483) |  |  |  |  |  |  |
| Controls Included | Yes | Yes | Yes | Yes | Yes | Yes | Yes | Yes | Yes | Yes |
| Time fixed effects | Yes | Yes | Yes | Yes | Yes | Yes | Yes | Yes | Yes | Yes |
|  |  |  |  |  |  |  |  |  |  |  |
| Wald-Chi2 |  |  |  |  |  |  |  |  |  |  |
| Pseudo R2 |  |  |  |  |  |  |  |  |  |  |
| Observations | 9,682 | 9,682 | 9,682 | 9,682 | 6,975 | 6,975 | 6,975 | 2,707 | 2,707 | 2,707 |

Clustered standard errors in parentheses[[15]](#footnote-15)

*** p<0.01, ** p<0.05, * p<0.1

1. Note: This accounts for all employment to self-employment transitions, individuals who made multiple transitions are included. [↑](#footnote-ref-1)
2. Omitted due to collinearity. [↑](#footnote-ref-2)
3. This is calculated as the mean of the five individual satisfaction measures [↑](#footnote-ref-3)
4. Note: This accounts for all employment to self-employment transitions, individuals who made multiple transitions are included. [↑](#footnote-ref-4)
5. Standard errors clustered by individual. [↑](#footnote-ref-5)
6. Standard errors clustered by individual. [↑](#footnote-ref-6)
7. Standard errors clustered by individual. [↑](#footnote-ref-7)
8. Standard errors clustered by individual. [↑](#footnote-ref-8)
9. Standard errors clustered by individual. [↑](#footnote-ref-9)
10. Standard errors clustered by individual. [↑](#footnote-ref-10)
11. Standard errors clustered by individual. [↑](#footnote-ref-11)
12. Standard errors clustered by individual. [↑](#footnote-ref-12)
13. Standard errors clustered by individual. [↑](#footnote-ref-13)
14. Standard errors clustered by individual. [↑](#footnote-ref-14)
15. Standard errors clustered by individual. [↑](#footnote-ref-15)
